# Supplementary material
Source: publisher figshare collection journal article supplement (https://f1000.figshare.com/ndownloader/files/1450057)
Supplement: Supplementary file 1 [file 1450057]

Cases	Diagnosis	Plaques pathology	Tangles pathology	Lewy bodies pathology	Dynamin1 (ng/mg total prot)	Total CaMKII (arbitrary units)	pCaMKII (arbritary units)	ratio P/tot CaMKII (arbitrary units)
	(groups)	(semi-quantitative Abeta scores)	(semi-quantitative pTau scores)	(semi-quantitative alpha-synuclein scores)	(ELISA measurements)	Western blotting quantification	Western blotting quantification	Western blotting quantification
1	control	0	0	0	0.27	0.8	1.66	2.38
2	control	0	0	0		0.83	1.75	2.41
3	control	0	0	0	0.43
4	control	0	0	0	0.29	0.89	1.84	1.97
5	control	0	0	0	0.33	0.77	1.57	2.41
6	control				0.71	0.88	2.01	2.09
7	control	0	0	0	0.5	0.92	1.9	2.71
8	control	3	0		0.47	0.78	1.57	1.63
9	control	0	0	0	0.44	0.92	1.88	2.44
10	control	0	0	0	0.29	0.84	1.79	2.77
11	control	2	0	0	0.58	0.88	1.81	3.23
12	control	0	0		0.36	0.78	1.86	1.96
13	control	0	0	0	0.33	0.92	1.99	1.7
14	control	1	1	0	0.42	0.81	1.9	1.92
15	control	0	0	0	0.46	0.9	1.99	1.87
16	control	1	0	0	0.38	0.87	1.7	2.3
17	control	0	0	0	0.5	0.88	1.99	2.14
18	control	1	0	0	0.47	0.89	2.01	1.71
19	control				0.46	0.83	2.04	3.92
20	control	0	0		0.34	0.77	1.88	2.98
21	control	1	0	0	0.46	0.91	2.01	2.74
22	control	0	0	0	0.53	0.83	1.62	3.29
23	control	0	0	0	0.47	0.88	1.97	1.36
24	control	0	0	0	0.47	0.9	1.99	2.47
25	control	0	0	0	0.44	0.82	1.9	2.14
26	PDD	0		1	0.3	0.91	1.86	2.17
27	PDD	0	0	1	0.35	0.8	1.73	3.25
28	PDD		0	1	0.37
29	PDD	1	0	0	0.42	0.89	1.84	1.97
30	PDD	1	1	1	0.35	0.89	1.84	2.16
31	PDD		1	1	0.56	0.9	1.81	2.18
32	PDD	2	1	2	0.34	0.91	1.81	1.66
33	PDD	2	2	3	0.34	0.92	1.81	1.93
34	PDD	1	0	1	0.36	0.9	1.79	1.75
35	PDD	2	1	1	0.58	0.86	1.79	1.86
36	PDD	1	1	0
37	PDD	2	1	1	0.24	0.82	1.77	2.33
38	PDD	0	0	1	0.39
39	PDD	1	0	0		0.89	1.88	3.1
40	PDD	3	0	0	0.29		1.77	3.14
41	PDD	2	0	0	0.36	0.85	1.86	3.51
42	PDD	0	1	0	0.35
43	PDD	1	1	0	0.59	0.79	1.75	1.68
44	PDD	0	0	0	0.78	0.82	1.75	2.54
45	PDD	1	0	0	0.51	0.82	1.75	2.1
46	PDD	1	1	0	0.4	0.9	1.86	2.29
47	PDD	0	0	1	0.31	0.77	1.75	2.72
48	PDD	0	0	0	0.29	0.9	1.86	2.28
49	PDD	3	1	0	0.4	0.92	1.86	2.56
50	PDD	0	0	0	0.25	0.9	1.86	2.03
51	PDD	1	0	0	0.53	0.82	1.75	1.76
52	PDD	3	1	1	0.49	0.81	1.75	1.47
53	PDD	3	0	0	0.36	0.82	1.73	2.13
54	PDD	3	0	0	0.58	0.82	1.73	1.65
55	PDD	2	1	1	0.36	0.81	1.73	2.63
56	PDD	1	1	2	0.44	0.9	1.84	2.22
57	PDD		0	0	0.43	0.82	1.7	2.07
58	PDD	0	0	0	0.34	0.82	1.7	1.88
59	PDD	1	1	1	0.35	0.89	1.81	2.27
60	DLB	3	1	2	0.66	0.84	1.95	2.24
61	DLB	2	1	2	0.56	0.91	2.06	1.84
62	DLB	3	3	0	0.41	0.84	2.1	2.2
63	DLB	2	0	2	0.45	0.9	2.04	2.14
64	DLB	1	1	0
65	DLB	1	0	0	0.22	0.81	1.82	2.65
66	DLB	2	0	1	0.27	0.83	1.73	1.8
67	DLB	1	1	2	0.44	0.86	1.84	1.74
68	DLB	3	3	3	0.49	0.78	1.7	1.94
69	DLB	1	2	1	0.25	0.9	1.81	2.3
70	DLB	3	2	1	0.3	0.76	1.68	1.82
71	DLB	0	1	2	0.33	0.77	1.68	2.06
72	DLB	1	1	1		0.91	1.77	1.89
73	DLB	1	1	1	0.41	0.88	1.75	1.63
74	DLB	3	1	2	0.42	0.92	1.75	1.83
75	DLB	1	2	1	0.29
76	DLB	0	1	1	0.26	0.88	1.68	2.74
77	DLB	3	1	0	0.42	0.82	1.62	2.12
78	DLB	1	0	1	0.27	0.75	1.62	1.75
79	DLB	0	0	0	0.28	0.79	1.82	1.81
80	DLB	0	0	0	0.59	0.85	1.84	1.96
81	DLB	2	0	3	0.45	0.85	1.9	2.17
82	DLB	3	1	1	0.43	0.85	1.88	2.24
83	DLB	1	1	1	0.6	0.81	1.79	2.13
84	DLB	2	1	1	0.65	0.81	1.88	2.15
85	DLB	2	1	1	0.29	0.87	1.86	1.88
86	DLB	0	0	1	0.45	0.75	1.62	1.9
87	DLB	3	3	3		0.91	1.75	1.97
88	DLB	0	1	2		0.84	1.68	1.84
89	DLB	3	2	3		0.83	1.62	1.63
90	DLB	3	1	2		0.81	1.57	1.75
91	DLB	0	0	2		0.87	1.75	1.46
92	DLB	2	2	0		0.88	1.7	3.26
93	DLB	3	2	3		0.82	1.59	2.67
94	DLB	1	1	2		0.79	1.59	1.85
95	DLB	2	3	1		0.82	1.59	2.02
96	DLB	3	1	3		0.91	1.75	2.22
97	DLB	1	0	3		0.92	1.88	1.85
98	DLB	1	1	1
99	DLB	2	0	0
100	DLB	1	1	2
101	DLB	1	1	3		0.82	1.59	1.63
102	DLB	0	0	2		0.91	1.75	1.63
103	DLB	0	1	3		0.92	1.79	1.66
104	DLB	2	1	1		0.83	1.66	2.33
105	DLB	1	0	1
106	DLB	3	0	1		0.92	1.79	2.04
107	DLB	1	1	1		0.79	1.66	1.7
108	DLB	0	0	0		0.92	1.73	1.91
109	DLB	1	1	2		0.91	1.92	1.44
110	DLB	0	0	1	0.42	0.87	1.88	1.61
111	DLB	2	0		0.34	0.88	1.81	1.92
112	DLB	1	1	1	0.42	0.84	1.81	1.81
113	DLB	0	1	0	0.26		1.7	2.27
114	DLB	2	3	1	0.49	0.82	1.68	2.07
115	AD	3	3	0	0.49	0.92	1.7	3.06
116	AD	3	3	0	0.39	0.82	1.59	1.98
117	AD	3	3	0	0.37	0.76	1.59	2.21
118	AD	3	3	0	0.38	0.83	1.57	1.71
119	AD	3	3	0	0.32	0.8	1.62	1.96
120	AD	3	3	0		0.77	1.59	2.11
121	AD	3	2	0	0.44	0.83	1.62	3.16
122	AD	1	2	0	0.45	0.82	1.59	2.09
123	AD	3	3	0	0.46	0.9	1.7	1.95
124	AD	2	3	0	0.24	0.85	1.73	2.34
125	AD	3	3	0	0.47	0.78	1.55	2.08
126	AD	3	3	0	0.51	0.84	1.59	1.96
127	AD	3	3	1	0.2	0.82	1.57	1.71
128	AD	2	3	1		0.91	1.7	1.96
129	AD	1	2	0	0.28	0.82	1.57	2.09
130	AD	3	3	0	0.47	0.91	1.7	1.96
